# Supplementary material for: Light wavelength and pulsing frequency affect avoidance responses of Canada geese
Source: PeerJ. 2023 Nov 21;11:e16379. doi: 10.7717/peerj.16379 (PMC10668863; doi:10.7717/peerj.16379)
Supplement: Supplemental Information 5 [file peerj-11-16379-s005.xlsx]

## Sheet: Sheet1
Response	Study ID	Title	Year	Citation	Color Category	Light	Peak Wavelength	Species	Order	Metric
Attraction	NA	Blue light attracts nocturnally migrating birds	2020	Zhao et al. 2020	Blue	LED	455 nm	Nocturnal migrants	Passeriformes, Cuculiformes, Pelecaniformes, Columbiformes, Gruiformes, Charadriiformes, Coraciiformes, Strigiformes, Psittaciformes	Bird Abundance
Avoidance	NA	Avoidance of different durations, colours and intensities of artifiicial light by adult seabirds	2021	Syposz et al.2021	Blue	LED	450 nm	Manx Shearwaters (Puffinus puffinus)	Procellariiformes	Bird Abundance
Avoidance	128	Assessing bird avoidance of high-contrast lights using a choice test approach: implications for reducing human-induced avian mortality	2018	Goller et al. 2018	Blue	LED	464 nm	Brown-headed Cowbird (Molothrus ater)	Passeriformes	Discrete Choice
Attraction	NA	Penguin colony attendance under artificial lights for ecotourism	2018	Rodriguez et al. 2018	Blue	LED	UA	Little Penguin (Eudyptula minor)	Sphenisciformes	Behavioral Response
Attraction	NA	Attraction of nocturnally migrating birds to artificial light: The influence of colour, intensity and blinking mode under different cloud cover conditions	2019	Rebke et al. 2019	Blue, Green	LED	470, 530 nm	Nocturnal migrants	Passeriformes	Bird Abundance
Avoidance, only with concentrated beam	418	Physical techniques for controlling birds to reduce aircraft strike hazards	1972	Lustick 1972	Blue/Green	LASER	UA	European Starling (Sturnus vulgaris)	Passeriformes	Approach or flee response
Avoidance, only with concentrated beam	419	Physical techniques for controlling birds to reduce aircraft strike hazards	1972	Lustick 1973	Blue/Green	LASER	UA	European Starling (Sturnus vulgaris)	Passeriformes	Approach or flee response, Flight path characteristics
Avoidance, only with concentrated beam	420	Physical techniques for controlling birds to reduce aircraft strike hazards	1972	Lustick 1974	Blue/Green	LASER	UA	Mallard Duck (Anas platyrhynchos)	Anseriformes	Approach or flee response, Mortality
Avoidance, only with concentrated beam	421	Physical techniques for controlling birds to reduce aircraft strike hazards	1972	Lustick 1975	Blue/Green	LASER	UA	Mallard Duck (Anas platyrhynchos)	Anseriformes	Approach or flee response
Avoidance, only with concentrated beam	422	Physical techniques for controlling birds to reduce aircraft strike hazards	1972	Lustick 1976	Blue/Green	LASER	UA	European Herring Gull (Larus argentatus)	Charadriiformes	Approach or flee response
Avoidance	15	Green light for nocturnally migrating birds	2009	Poot et al. 2009	Blue/Green	Metal Halide	535 nm	Nocturnal migrants; thrushes, smaller songbirds, shorebirds, ducks, geese (genus/species not specified)	Passeriformes, Anseriformes	Linear/non-linear flight path
Avoidance	NA	Intense short-wavelength light triggers avoidance response by Red-tailed Hawks: A new tool for raptor diversion?	2017	Foss et al. 2017	Blue/UV	LED	445 nm	Red Tail Hawk (Buteo jamaicensis)	Accipitriformes	Bird Abundance, Avoidance to lure station
Attraction	311	Evaluation of New Obstruction Lighting Techniques To Reduce Avian Fatalities	2012	Patterson 2012	Red	Flashing Light	UA	Multiple Species	Passeriformes, Gruiformes	Counts or presence of dead or injured birds
Avoidance	NA	Penguin colony attendance under artificial lights for ecotourism	2018	Rodriguez et al. 2018	Red	LED	UA	Little Penguin (Eudyptula minor)	Sphenisciformes	Behavioral Response
Attraction	357	Lasers as Nonlethal Avian Repellents	2002	Blackwell et al. 2002	Red	LASER	633 nm	European Starling (Sturnus vulgaris)	Passeriformes	Free Choice (Time Spent)
Attraction	NA	Avoidance of different durations, colours and intensities of artifiicial light by adult seabirds	2022	Syposz et al.2022	Red	LED	620 nm	Manx Shearwaters (Puffinus puffinus)	Procellariiformes	Bird Abundance
Attraction	NA	Communication towers, lights, and birds: successful methods of reducing the frequency of avian collisions	2009	Gehring et al. 2009	Red	LED	NA			Counts or presence of dead or injured birds
Attraction	15	Green light for nocturnally migrating birds	2008	Poot et al. 2008	Red	Metal Halide	670 nm	Nocturnal migrants; thrushes, smaller songbirds, shorebirds, ducks, geese (genus/species not specified)	Passeriformes, Anseriformes	Linear/non-linear flight path
Avoidance	128	Assessing bird avoidance of high-contrast lights using a choice test approach: implications for reducing human-induced avian mortality	2019	Goller et al. 2019	Red	LED	633 nm	Brown-headed Cowbird (Molothrus ater)	Passeriformes	Discrete Choice
Avoidance	329	Effectiveness of a Motion-Activated Laser Hazing System for Repelling Captive Canada Geese	2006	Werner and Clark 2006	Red	LASER	650 nm	Canada Goose (Branta canadensis)	Anseriformes	Free Choice (Time Spent)
Avoidance	360	Lasers as Nonlethal Avian Repellents	2002	Blackwell et al. 2002	Red	LASER	650 nm	Canada Goose (Branta canadensis)	Anseriformes	Free Choice (Time Spent)
Avoidance	361	Lasers as Nonlethal Avian Repellents	2002	Blackwell et al. 2002	Red	LASER	650 nm	Mallard Duck (Anas platyrhynchos)	Anseriformes	Free Choice (Time Spent)
Avoidance	NA	Blue light attracts nocturnally migrating birds	2020	Zhao et al. 2020	Red	LED	620 nm	Nocturnal migrants	Passeriformes, Cuculiformes, Pelecaniformes, Columbiformes, Gruiformes, Charadriiformes, Coraciiformes, Strigiformes, Psittaciformes	Bird Abundance
Avoidance	NA	Attraction of nocturnally migrating birds to artificial light: The influence of colour, intensity and blinking mode under different cloud cover conditions	2020	Rebke et al. 2020	Red	LED	627 nm	Nocturnal migrants	Passeriformes	Bird Abundance
Avoidance, but Attracted to the Area at Night	381	Avian collision risk at an offshore wind farm	2005	Desholm and Kahlert 2005	Red	Flashing Light	UA	Common Eider (Somateria mollissima) and geese; nocturnal migrants	Anseriformes	Direction, Abundance or density, Locations of individual birds, Counts or presence of dead or injured birds
Avoidance, Habituation	359	Lasers as Nonlethal Avian Repellents	2002	Blackwell et al. 2002	Red	LASER	650 nm	Rock Dove (Columba livia)	Columbiformes	Free Choice (Time Spent)
