# Supplementary material for: Light wavelength and pulsing frequency affect avoidance responses of Canada geese
Source: PeerJ journal article supplement (doi:10.7717/peerj.16379), 2023-11-21
Supplement: Supplementary_Figure_1.pdf [file Supplementary_Figure_1.pdf]

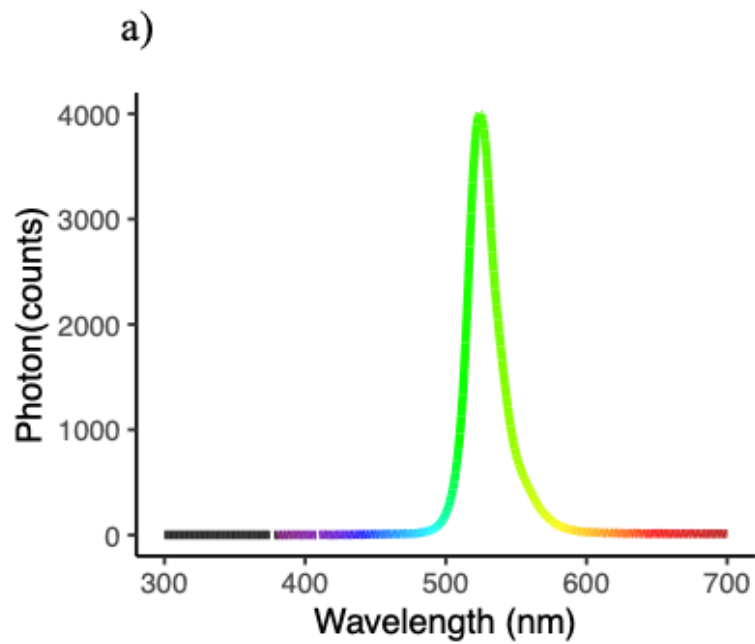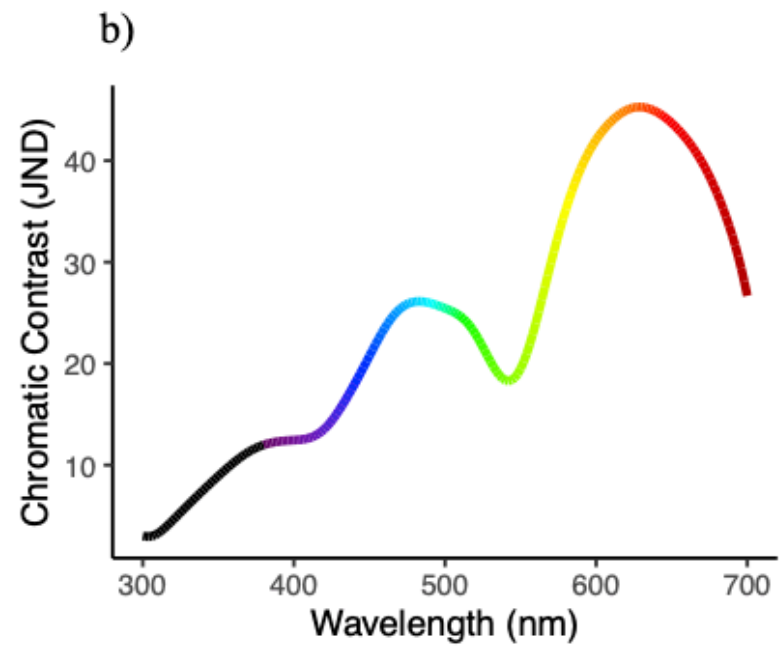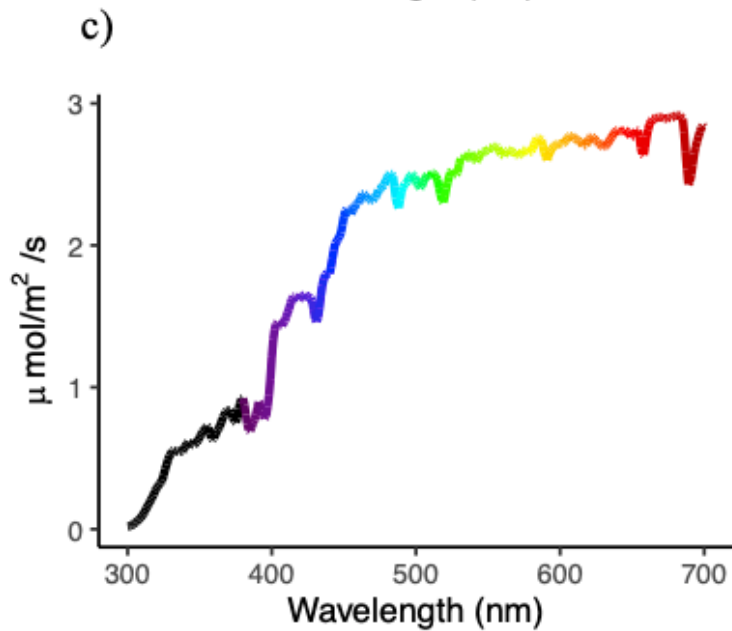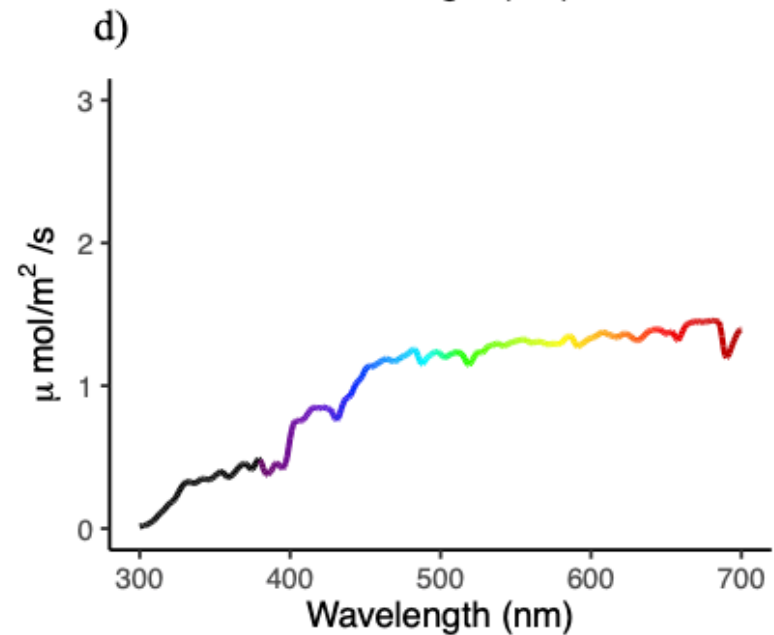

e)

| Ambient Conditions | Blue Light (483 nm) | Red Light (631 nm) |
|--------------------|---------------------|--------------------|
| Clear Sky          | 26.11               | 45.30              |
| Cloudy Sky         | 27.51               | 43.80              |
