# Supplementary material for: Light wavelength and pulsing frequency affect avoidance responses of Canada geese
Source: PeerJ journal article supplement (doi:10.7717/peerj.16379), 2023-11-21

b)

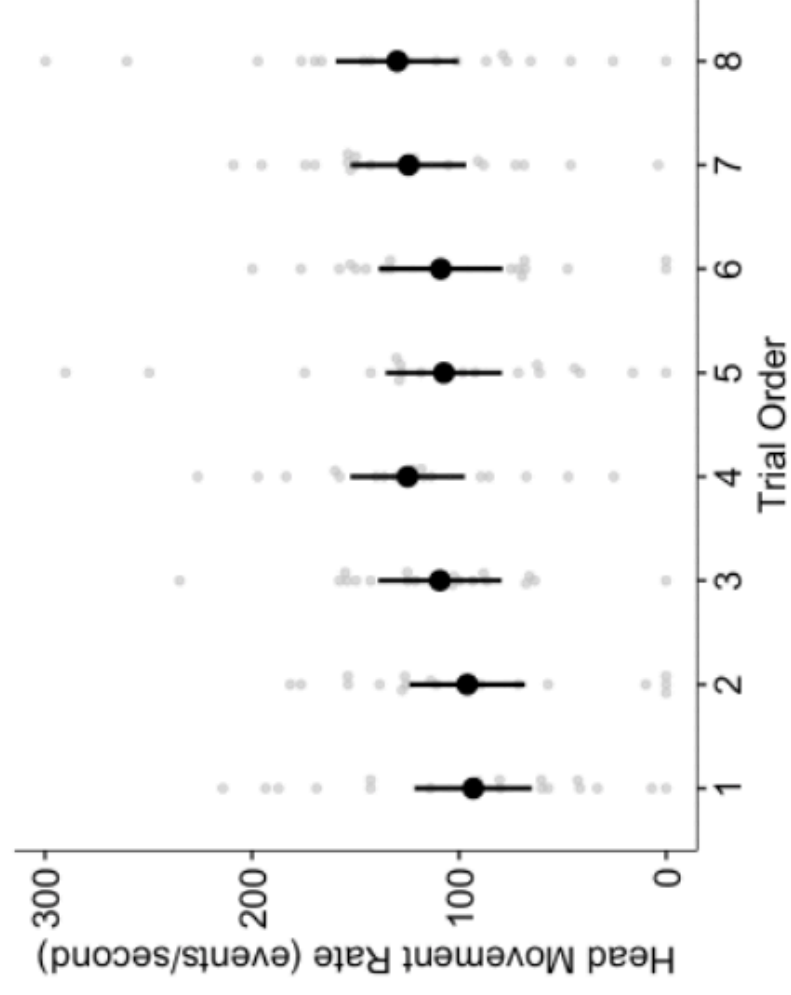

a)

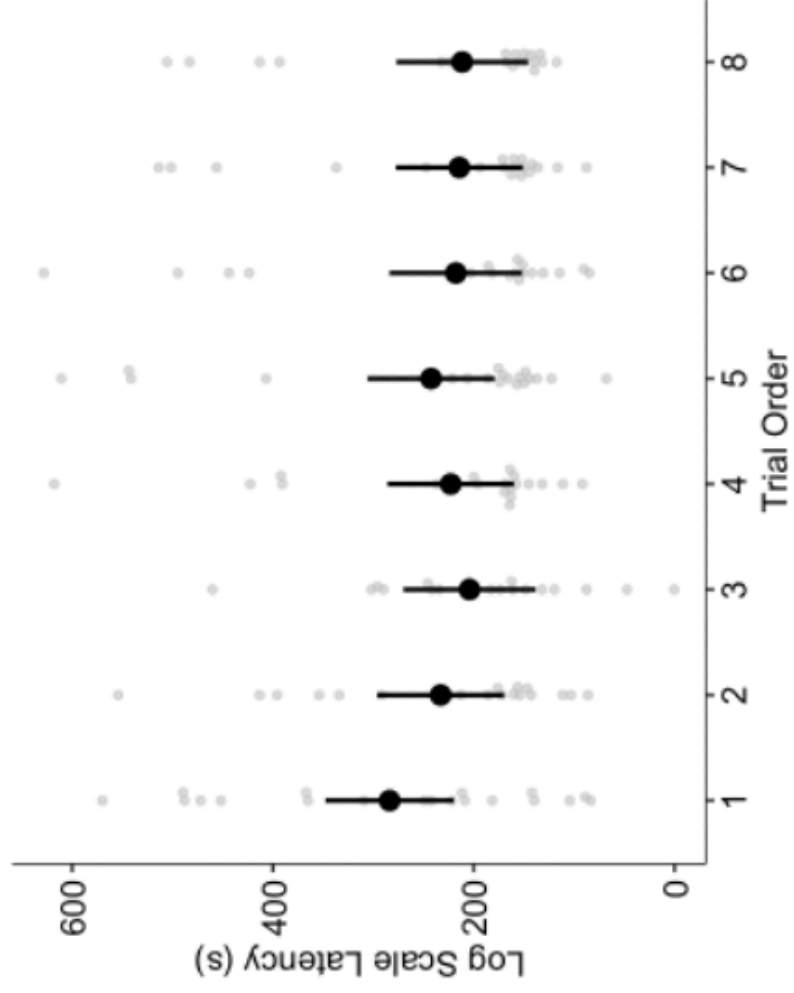

Supplement: Supplementary_Figure_4.pdf [file Supplementary_Figure_4.pdf]
